# Supplementary material for: Sex Difference of Effect of Sophora flavescens on Gut Microbiota in Rats
Source: Hindawi journal article supplement (doi:10.1155/2022/4552904), 2022-03-15
Supplement: f1 [file 4552904.f1.zip]

**Table S1 Analysis of similarity (ANOSIM) of gut microbiota composition in SD rats**

| Groups               | R    | P.value | Dissimilarity | Permutation |
|----------------------|------|---------|---------------|-------------|
| Females-F VS Males-F | 0.14 | 0.06    | Bray-curtis   | 999         |
| Females-J VS Males-J | 0.25 | 0.02    | Bray-curtis   | 999         |

F stands for fecal samples; J stands for jejunal samples, n=10 per group

**Table S2 Permutational multivariate analysis of variance (PERMANOVA) of gut microbiota composition in SD rats.**

| Groups               | Df | SumsOfSqs | F.Model | R2   | P.value |
|----------------------|----|-----------|---------|------|---------|
| Females-F VS Males-F | 1  | 0.29      | 1.95    | 0.10 | 0.049   |
| Females-J VS Males-J | 1  | 0.63      | 3.07    | 0.15 | 0.02    |

F stands for fecal samples; J stands for jejunal samples, n=10 per group.

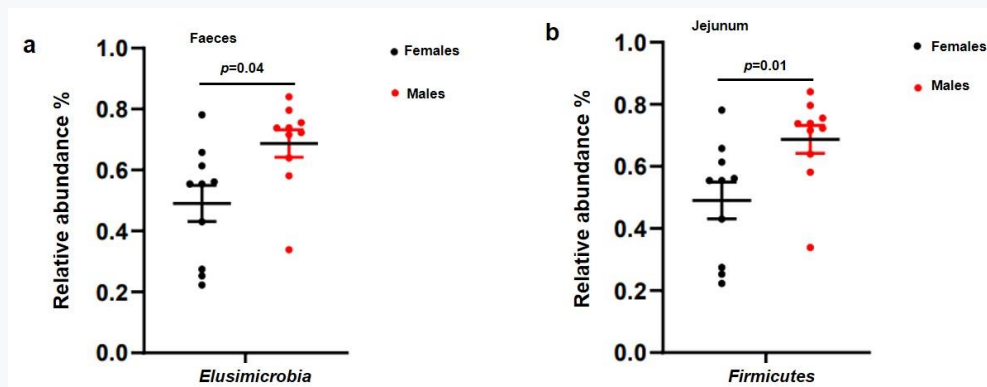

Fig. S1 Relative abundances distributions per group for the taxa (at phylum level). In faeces or jejunum, the individuals are grouped by Females, Males, n=10 per group, *P* values from Mann–Whitney U test. .shown for the bacterial taxonomic rank of phylum.

**Table S3 The influence of sex on the structure of intestinal microflora**

| Samples | Taxonomy<br>(Family or Genus)         | Relative abundance<br>(%, Mean values±SD, n=10) |                   | p-value<br>(adjusted)* |
|---------|---------------------------------------|-------------------------------------------------|-------------------|------------------------|
|         |                                       | Females                                         | Males             |                        |
| Faeces  | <i>Alloprevotella</i>                 | <b>0.04±0.04</b>                                | 0.01±0.04         | 0.002                  |
|         | <i>Elusimicrobium</i>                 | 0.01±0.01                                       | <b>0.030±0.01</b> | 0.04                   |
|         | <i>Helicobacter</i>                   | <b>0.01±0.01</b>                                | 0.001±0.001       | 0.01                   |
|         | <i>Lachnospiraceae_incertae_sedis</i> | 0.001±0.001                                     | <b>0.01±0.003</b> | 0.0005                 |
|         | <i>Desulfovibrionaceae</i>            | <b>0.003±0.003</b>                              | 0.001±0.001       | 0.02                   |
| Jejunum | <i>Anaerorhabdus</i>                  | 0.002±0.002                                     | <b>0.01±0.004</b> | 0.03                   |
|         | <i>Blautia</i>                        | 0.05±0.06                                       | <b>0.12±0.10</b>  | 0.04                   |
|         | <i>Corynebacterium</i>                | 0.002±0.005                                     | <b>0.01±0.01</b>  | 0.02                   |
|         | <i>Roseburia</i>                      | <b>0.01±0.02</b>                                | 0.0002±0.0003     | 0.01                   |
|         | <i>Rothia</i>                         | <b>0.32±0.24</b>                                | 0.10±0.16         | 0.01                   |
|         | <i>Lachnospiraceae</i>                | 0.005±0.006                                     | <b>0.01±0.01</b>  | 0.04                   |
|         | <i>Coriobacteriaceae</i>              | 0.007±0.01                                      | <b>0.03±0.03</b>  | 0.02                   |

\* p value were adjusted using Benjamini-Hochberg FDR
