# Supplementary material for: Sex Difference of Effect of Sophora flavescens on Gut Microbiota in Rats
Source: Evid Based Complement Alternat Med. 2022 Mar 15;2022:4552904. doi: 10.1155/2022/4552904 (PMC8941563; doi:10.1155/2022/4552904)
Supplement: Supplementary Materials — Table S1, S2: analysis of similarity (ANOSIM) and permutational multivariate analysis of variance (PERMANOVA) of gut microbiota composition in SD rats, respectively. Table S3: the influence of sex on the structure of intestinal microflora. Figure S1: relative abundances distributions per group for the taxa (at phylum level) in SD rats. [file 4552904.f1.zip]

Archive with 2 entries (2 files):
- 4552904.f1/qRT-PCR(The raw data ).txt
- 4552904.f1/Supplementary data.pdf
