# Supplementary material for: Sex Difference of Effect of Sophora flavescens on Gut Microbiota in Rats
Source: Evid Based Complement Alternat Med. 2022 Mar 15;2022:4552904. doi: 10.1155/2022/4552904 (PMC8941563; doi:10.1155/2022/4552904)
Supplement: Supplementary Materials — Table S1, S2: analysis of similarity (ANOSIM) and permutational multivariate analysis of variance (PERMANOVA) of gut microbiota composition in SD rats, respectively. Table S3: the influence of sex on the structure of intestinal microflora. Figure S1: relative abundances distributions per group for the taxa (at phylum level) in SD rats. [file 4552904.f1.zip › 4552904.f1/qRT-PCR(The raw data ).txt]

	N0.			16	18	19	20	17		31	33	34	35	32		46	48	49	50	47		61	63	64	65	62			21	23	24	25	22		36	38	39	40	37		51	53	54	55	52		66	68	69
	group			16	17	18	19	20		31	32	33	34	35		46	47	48	49	50		61	62	63	64	65			21	22	23	24	25		36	37	38	39	40		51	52	53	54	55		66	67	68
	Duration of drug intervention (week)			1	1	1	1	1		1	1	1	1	1		1	1	1	1	1		1	1	1	1	1			2	2	2	2	2		2	2	2	2	2		2	2	2	2	2		2	2	2
genus	0			K1-2-1	D1-2-1	Z1-2-1	G1-2-1	A1-2-1		K1-3-1	D1-3-1	Z1-3-1	G1-3-1	A1-3-1		K1-4-1	D1-4-1	Z1-4-1	G1-4-1	A1-4-1		K1-5-1	D1-5-1	Z1-5-1	G1-5-1	A1-5-1			K2-2-1	D2-2-1	Z2-2-1	G2-2-1	A2-2-1		K2-3-1	D2-3-1	Z2-3-1	G2-3-1	A2-3-1		K2-4-1	D2-4-1	Z2-4-1	G2-4-1	A2-4-1		K2-5-1	D2-5-1	Z2-5-1
Enterococcus				Duo+Ctr	Duo+Low	Duo+Mid	Duo+Hig	Duo+Ant		Jej+Ctr	Jej+Low	Jej+Mid	Jej+Hig	Jej+Ant		Ile+Ctr	Ile+Low	Ile+Mid	Ile+Hig	Ile+Ant		Col+Ctr	Col+Low	Col+Mid	Col+Hig	Col+Ant			Duo+Ctr	Duo+Low	Duo+Mid	Duo+Hig	Duo+Ant		Jej+Ctr	Jej+Low	Jej+Mid	Jej+Hig	Jej+Ant		Ile+Ctr	Ile+Low	Ile+Mid	Ile+Hig	Ile+Ant		Col+Ctr	Col+Low	Col+Mid
	1			4.24	3.94	4.38	4.65	4.02		2.11	1.45	1.38	2.07	1.42		1.83	2.07	2.19	1.66	1.97		1.44	1.54	1.87	1.26	2.09			2.52	1.93	2.26	2.76	2.13		2.35	2.96	2.95	4.23	3.98		1.60	1.45	1.52	1.30	2.17		3.27	1.27	1.64
	2			4.32	4.05	4.62	4.76	4.11		2.12	1.54	1.44	2.08	1.46		1.86	2.12	2.19	1.76	2.25		1.48	1.56	1.94	1.37	2.15			2.56	2.22	2.32	2.86	2.64		2.45	3.24	3.25	4.29	4.02		1.86	1.57	1.77	1.43	2.42		3.55	1.48	1.74
	3			4.35	4.29	4.82	4.76	4.23		2.14	1.62	1.54	2.14	1.56		1.92	2.31	2.34	1.96	2.41		1.48	1.87	1.98	1.46	2.24			2.62	2.24	2.53	3.24	2.72		2.63	3.32	3.89	4.35	4.19		1.94	1.62	1.86	1.57	3.24		3.56	1.64	1.94
	4			4.59	4.42	4.96	4.86	4.29		2.36	1.67	1.55	2.14	1.57		2.06	2.35	2.37	2.07	2.44		1.54	2.32	2.96	1.54	2.33			2.87	2.36	2.62	3.25	3.02		2.86	3.72	3.97	4.64	4.36		1.96	1.85	2.03	1.94	3.32		3.58	1.67	2.83
	5			4.86	4.52	5.06	4.86	4.75		2.52	1.72	1.56	2.14	1.64		2.14	2.48	2.42	2.13	2.46		1.56	2.87	3.06	1.59	2.74			2.97	2.43	2.86	3.43	4.97		3.14	3.86	4.03	4.64	4.52		2.02	2.01	2.04	2.10	3.66		3.74	1.69	2.94
	6			4.87	4.58	5.06	5.12	4.98		2.52	1.78	1.56	2.24	1.64		2.35	2.56	2.45	2.18	2.58		1.66	2.94	3.11	1.68	2.86			3.01	2.64	2.87	3.72	5.36		3.35	3.91	4.35	4.75	4.63		2.12	2.13	2.14	2.23	4.06		3.75	1.84	2.99
Bacteriodes	1			1.45	1.37	2.22	1.87	1.55		3.21	2.83	3.68	2.55	3.11		2.15	1.65	1.85	1.07	0.84		2.05	1.63	1.67	1.53	1.05			2.64	1.68	1.98	1.68	1.98		3.86	4.28	3.69	3.69	3.48		1.74	1.87	1.86	2.56	0.73		2.15	2.25	2.15
	2			1.49	1.42	2.23	1.89	1.58		3.42	2.97	3.78	2.67	3.29		2.17	1.77	2.07	1.23	0.98		2.16	1.72	1.85	1.71	1.23			3.02	1.77	2.04	1.78	2.21		4.03	4.36	3.76	3.77	3.58		1.89	1.93	2.04	2.64	0.96		2.31	2.57	2.17
	3			1.73	1.56	2.32	1.91	1.62		3.63	3.02	3.88	2.88	3.33		2.27	1.83	2.23	1.43	1.01		2.17	1.82	2.05	1.93	1.86			3.04	1.98	2.09	1.93	2.52		4.12	4.45	3.78	3.97	3.87		1.92	2.06	2.33	2.64	1.04		2.42	2.96	2.21
	4			1.75	1.95	2.44	2.29	1.65		4.36	3.35	3.93	4.07	3.33		2.45	2.46	2.35	1.83	1.75		2.32	1.94	2.48	1.96	1.98			3.15	2.08	2.10	2.07	2.54		4.36	4.56	3.93	4.78	3.93		1.94	2.34	3.24	2.73	1.35		2.51	3.01	2.32
	5			1.96	2.10	2.54	2.33	1.73		4.61	3.44	4.02	4.21	3.52		2.52	2.57	2.45	1.97	2.29		2.56	2.04	2.67	2.25	2.02			3.15	2.09	2.14	2.73	2.62		4.71	4.88	3.98	5.04	4.15		2.06	2.76	3.55	3.02	1.54		2.54	3.26	2.33
	6			2.06	2.15	2.56	2.43	1.88		4.68	3.54	4.15	4.43	3.65		2.52	2.67	2.73	2.17	2.35		2.63	2.15	3.02	2.52	2.11			3.24	2.14	2.25	2.76	2.68		4.82	4.88	4.27	5.32	4.23		2.07	2.86	3.76	3.21	1.60		2.82	3.57	2.56
Lactobacillus	1			4.15	4.04	4.25	4.01	2.94		4.35	3.18	4.14	4.44	2.86		3.82	2.86	3.75	3.25	2.53		4.35	3.07	4.86	3.14	2.56			3.84	4.11	4.27	4.53	3.86		2.93	3.73	4.12	4.35	3.71		5.06	3.01	4.06	3.54	3.13		4.86	4.01	4.21
	2			4.25	4.18	4.31	4.11	3.14		4.37	3.82	4.21	4.68	3.11		4.16	2.93	3.97	3.26	2.61		4.67	3.19	5.12	3.27	2.75			3.96	4.33	4.41	4.75	3.96		3.02	3.97	4.15	4.38	4.06		5.11	3.23	4.11	3.56	3.24		4.92	4.17	4.36
	3			4.26	4.31	4.34	4.29	3.26		4.37	3.88	4.24	4.76	3.25		4.26	3.01	4.01	4.12	2.68		4.68	3.85	5.25	3.86	2.81			4.01	4.35	4.49	4.78	4.01		3.03	4.01	4.26	4.63	4.28		5.16	3.24	4.19	3.86	3.41		4.92	4.23	4.36
	4			4.41	4.34	4.35	4.50	3.33		4.65	3.97	4.39	4.88	3.37		4.32	4.36	4.19	4.35	3.05		4.96	3.86	5.32	5.05	3.05			4.18	4.48	4.54	4.86	4.21		4.03	4.06	4.31	4.64	4.52		5.25	4.74	4.37	4.01	3.43		5.02	4.53	4.44
	5			4.43	4.38	4.46	4.65	3.86		4.88	4.06	4.46	4.94	3.87		4.35	4.92	4.26	4.67	3.13		5.14	4.39	5.33	5.31	4.10			4.39	4.64	4.55	5.02	4.35		4.12	4.24	4.36	5.12	4.93		5.28	4.97	4.42	4.32	3.52		5.05	4.63	4.89
	6			4.63	4.40	4.91	4.86	3.91		4.93	4.24	4.85	5.01	4.22		4.55	4.97	4.33	5.05	3.23		5.47	4.55	5.36	5.32	4.23			4.55	4.91	4.69	5.06	4.46		4.39	4.32	4.47	5.25	5.01		5.36	5.00	4.75	4.35	3.62		5.13	4.75	4.93
Clostridium	1			2.47	2.01	2.93	1.56	1.87		2.14	1.19	1.75	1.85	1.03		2.66	2.56	2.76	2.85	1.87		1.69	2.23	1.46	2.52	1.30			3.06	2.02	1.98	2.04	1.86		1.79	1.95	1.86	2.11	0.97		2.99	2.29	2.18	2.11	2.15		3.15	2.64	2.35
	2			2.53	2.06	2.96	1.84	1.99		2.32	1.25	2.02	1.86	1.23		2.74	2.63	3.05	2.86	1.96		1.71	2.58	1.74	2.59	1.73			3.25	2.54	2.11	2.14	2.18		1.80	2.02	1.92	2.45	1.04		3.27	2.56	2.31	2.19	2.18		3.25	2.65	2.52
	3			2.85	2.14	3.05	1.97	2.03		2.34	1.42	2.03	1.91	1.25		2.82	2.78	3.10	2.96	2.12		1.94	2.63	2.10	2.63	1.80			3.75	2.75	2.19	2.21	2.65		1.85	2.11	2.01	2.88	1.43		3.32	3.02	2.32	2.45	2.45		3.29	2.73	2.86
	4			2.93	2.35	4.16	3.12	2.45		2.43	1.60	2.11	1.99	1.35		2.97	3.07	3.10	3.04	2.33		1.96	2.64	2.14	2.73	2.08			4.15	3.26	3.12	4.61	3.71		1.93	2.21	2.11	2.88	3.25		3.58	3.22	2.46	3.22	2.87		3.37	2.73	2.91
	5			3.03	2.35	4.45	3.15	3.14		2.46	1.63	2.12	2.00	1.55		3.05	3.38	3.20	3.08	3.12		2.31	2.70	2.36	2.82	2.12			4.39	4.02	3.57	5.27	3.98		1.96	2.37	2.15	2.97	3.83		3.64	3.33	2.55	3.45	4.11		3.52	2.85	3.01
	6			3.05	2.43	4.90	3.52	3.21		2.59	1.81	2.43	2.04	1.58		3.05	3.49	3.23	3.28	3.21		2.53	2.84	2.56	2.85	2.36			4.40	4.05	3.62	5.31	4.02		2.01	2.45	2.28	3.00	3.86		3.75	3.87	2.64	3.48	4.21		3.72	2.91	3.10
		1-3 ��Female
		4-6: male
		Ctr, Low , Med, Hig and Ant represent normal group, Low, medium and high dose groups of S. flavescens and antibiotic group, respectively.
		Duo, Jej, Ile, and Col represent duodenum, jejunum, ileum and colon�� respectively
[truncated: 22 more columns]
